# Supplementary material
Source: publisher figshare collection journal article supplement (https://karger.figshare.com/ndownloader/files/12418649)
Supplement: Supplementary file 1 [file 12418649]

### Table S3: The Netherlands: Results of the final annual treatment participation model (c fixed to 0.04)

|  | Imputed dataset | |  |  | Complete dataset | |  |
| --- | --- | --- | --- | --- | --- | --- | --- |
|  | Estimate | SE | P |  | Estimate | SE | P |
| a | -0.158 | 0.048 | 0.0014 |  | -0.096 | 0.042 | 0.0228 |
| b | -0.332 | 0.042 | <.0001 |  | -0.107 | 0.056 | 0.0567 |
| d | -0.541 | 0.012 | <.0001 |  | -0.426 | 0.010 | <.0001 |
| aFemale | -0.378 | 0.074 | <.0001 |  | -0.287 | 0.086 | 0.0008 |
| aInject | 0.214 | 0.080 | 0.0097 |  | 0.402 | 0.077 | <.0001 |
| dMigrant | -0.314 | 0.014 | <.0001 |  | -0.225 | 0.013 | <.0001 |
| dFemale | -0.133 | 0.020 | <.0001 |  | -0.071 | 0.017 | <.0001 |
| dInject | 0.044 | 0.017 | 0.0114 |  | 0.061 | 0.013 | <.0001 |
|  |  |  |  |  |  |  |  |
|  | RR | 95% CI- | 95% CI+ |  | RR | 95% CI- | 95% CI+ |
| dMigrant | 0.730 | 0.710 | 0.751 |  | 0.799 | 0.779 | 0.819 |
| dFemale | 0.875 | 0.841 | 0.911 |  | 0.931 | 0.900 | 0.964 |
| dInject | 1.045 | 1.010 | 1.081 |  | 1.063 | 1.037 | 1.090 |
|  |  |  |  |  |  |  |  |
|  |  |  |  |  |  |  |  |
| -2 Log-Likelihood | | 639669 |  |  |  | 426282 |  |
| BIC | | 639752 |  |  |  | 426362 |  |
|  |  |  |  |  |  |  |  |
|  |  |  |  |  |  |  |  |
| Observations | | 499554 |  |  |  | 322851 |  |
| Patients |  | 33024 |  |  |  | 21289 |  |
| Max. observations per patient | | 20 |  |  |  | 20 |  |
|  |  |  |  |  |  |  |  |
| Period |  | 1994-2014 |  |  |  | 1994-2014 |  |
